# Supplementary material for: Intranasal delivery of asenapine loaded nanostructured lipid carriers: formulation, characterization, pharmacokinetic and behavioural assessment
Source: Royal Society of Chemistry journal article supplement (doi:10.1039/c5ra19793g), 2016-01-01
Supplement: c5ra19793g1.pdf [file c5ra19793g1.pdf]

## Supplementary Material:

### 2.3.1. Quality target product profile

The quality target product profile (QTPP) is defined as “A prospective summary of the quality characteristics of a drug product that ideally will be achieved to ensure the desired quality, taking into account safety and efficacy of the drug product”. The target product profile forms the basis of design for development of the product<sup>1</sup>. Product attributes defining the QTPP for nanostructured lipid carriers includes particle size, polydispersity index, entrapment efficiency and stabilization of nanoparticles (ionic or steric hindrance). Justification for selection of attributes and desired target levels for each product attribute have been tabulated in Table I.

**Table I.** Quality target product profile of ANLC

| Product Attribute                     | Desired Target Attribute Level | Justification                                                                                                                                                                                                                                                                                                                                                                                                      |
|---------------------------------------|--------------------------------|--------------------------------------------------------------------------------------------------------------------------------------------------------------------------------------------------------------------------------------------------------------------------------------------------------------------------------------------------------------------------------------------------------------------|
| Particle Size (nm)<br>(d=50%)         | <200 nm                        | Based on the literature report, the particle size <200 nm have potential to cross blood brain barrier. Since brain is the desired target for action of asenapine, we have decided to make the nanoparticles in size of below 200 nm <sup>2, 3</sup> .                                                                                                                                                              |
| Entrapment Efficiency (% Drug Loaded) | >60%                           | High drug entrapment permits lower total volume/excipient for administration of formulation. This minimizes the undue exposure of excipients to tissues which may occur due to lower entrapment efficiency or high volume dose.                                                                                                                                                                                    |
| Polydispersity Index (PDI)            | <0.3                           | Since polydisperse system have greater tendency to aggregation than monodisperse system a lower PDI is desired to target the achievement of a stable nanoparticulate system.                                                                                                                                                                                                                                       |
| Ionic/steric stabilization            | Stable Nanosuspension          | Since the lipids and surfactants screened for the formulation are non-ionic, the charge on particles was predicted to be near neutral range with some residual charge from other sources. This was confirmed during the initial trials and evaluation of formulation characteristics (Zeta Potential: -2 to -5.98 mV). It was concluded that the stability of nanosuspension will be achieved by steric hindrance. |

### 2.3.2. Critical material attributes and process parameter

Critical material attribute (CMA) and critical process parameters (CPP) are defined as “A material or process whose variability has an impact a critical quality attribute and therefore it should be monitored or controlled to ensure desired drug product quality”. The Critical Quality Attribute (CQA) of drug product and their QTPP were contributed in selection of excipient and process parameters<sup>1</sup>. For preparation of ANLC, critical material attributes of drug substance asenapine and excipients including solid lipid, liquid lipid and surfactant were accessed. Further, two critical process parameters: homogenization speed and sonication time, were included based on the selected method for preparation of NLC (high shear homogenization and sonication). The justifications for selection of materials and process parameters have been tabulated in Table II.

**Table II.** Critical material attributes and critical process characteristics of ANLC.

| Drug substance attribute    |                       |                                                                                                                                                                                                                                                                                                                                                        |
|-----------------------------|-----------------------|--------------------------------------------------------------------------------------------------------------------------------------------------------------------------------------------------------------------------------------------------------------------------------------------------------------------------------------------------------|
| Drug Substance              |                       | Justification                                                                                                                                                                                                                                                                                                                                          |
| BCS Class                   | Class II              | Asenapine is classified as a BCS Class II compound (low solubility, high permeability). Low solubility problem may be overcome by nanonization of particles.                                                                                                                                                                                           |
| Sublingual bioavailability  | 35%                   | The low sublingual bioavailability and high gastro instability of asenapine, makes it a suitable candidate for nanoparticulate lipid drug delivery system.                                                                                                                                                                                             |
| Oral bioavailability        | <2%                   |                                                                                                                                                                                                                                                                                                                                                        |
| Excipients attribute        |                       |                                                                                                                                                                                                                                                                                                                                                        |
| Excipient                   |                       | Justification                                                                                                                                                                                                                                                                                                                                          |
| Selection of Solid Lipid    | Glyceryl monostearate | Drug solubility was evaluated in stearic acid, glyceryl monostearate, Compritol 888 ato and Precirol ATO 5. Based on high solubility, Glyceryl monostearate was selected as solid lipid. (Data not shown)                                                                                                                                              |
| Selection of Liquid lipid   | Oleic acid            | The trial batches were prepared with fixed ratio of liquid lipid (oleic acid, caprylic/capric triglyceride and propylene glycol dicaprylate/dicaprate) to solid lipid (GMS). The minimum particle size with sufficiently stable colloidal dispersion was obtained with oleic acid. (Data not shown)                                                    |
| Selection of Surfactant     | Tween-80              | Among screened surfactants having brain targeting ability (Tween 80 and Poloxamer 188), it was concluded that Tween 80 stabilized colloidal dispersion resulted in low particle size and had acceptable stability. (Data not shown)                                                                                                                    |
| Critical process parameters |                       |                                                                                                                                                                                                                                                                                                                                                        |
| Process                     |                       | Justification                                                                                                                                                                                                                                                                                                                                          |
| Homogenization speed        | 8000-16000 rpm        | The homogenization speed ranges were selected based on instrument limitation and trial batches. The homogenization speed less than 8000 rpm leads to large particle size and polydisperse colloidal system. However, the upper range was set at 16000, since no significant difference in particle size was observed above 16000 rpm. (Data not shown) |
| Sonication time             | 5-15 min              | The time duration for sonication was selected based on the literature and trial batches. Moreover, longer duration of sonication was avoided due to leaching of drug from matrix and possible metal contamination <sup>4</sup> . (Data not shown)                                                                                                      |

**Table III.** Composition of different batches and their response.

| Batch No | Composition and process variables |               |                 |          |             | Results     |            |             |
|----------|-----------------------------------|---------------|-----------------|----------|-------------|-------------|------------|-------------|
|          | OA/GMS (w/w)                      | ASM/GMS (w/w) | Tween-80 (%w/v) | HS (rpm) | ST (minute) | PS (nm)     | EE (%)     | PDI         |
| NLC -1   | 0.15                              | 0.15          | 1.00            | 12000.00 | 10.00       | 274.65±4.51 | 75.72±1.83 | 0.293±0.015 |
| NLC -2   | 0.10                              | 0.20          | 1.00            | 12000.00 | 10.00       | 309.75±3.63 | 69.62±2.52 | 0.361±0.027 |
| NLC -3   | 0.15                              | 0.15          | 1.00            | 12000.00 | 10.00       | 275.63±5.46 | 74.83±1.58 | 0.293±0.023 |
| NLC -4   | 0.15                              | 0.10          | 1.50            | 12000.00 | 10.00       | 195.51±6.35 | 59.93±2.62 | 0.220±0.018 |
| NLC -5   | 0.10                              | 0.15          | 0.50            | 12000.00 | 10.00       | 298.46±2.23 | 67.19±3.23 | 0.415±0.038 |
| NLC -6   | 0.15                              | 0.15          | 1.00            | 8000.00  | 5.00        | 310.98±3.71 | 87.22±1.71 | 0.373±0.022 |
| NLC -7   | 0.15                              | 0.20          | 0.50            | 12000.00 | 10.00       | 334.61±4.89 | 89.78±2.34 | 0.393±0.027 |
| NLC -8   | 0.15                              | 0.15          | 1.00            | 12000.00 | 10.00       | 275.61±2.35 | 74.14±2.61 | 0.296±0.011 |
| NLC -9   | 0.15                              | 0.15          | 1.00            | 16000.00 | 5.00        | 250.39±2.34 | 77.56±3.27 | 0.333±0.029 |
| NLC -10  | 0.10                              | 0.15          | 1.00            | 12000.00 | 5.00        | 297.27±5.25 | 69.72±1.54 | 0.293±0.021 |

|         |      |      |      |          |       |             |            |             |
|---------|------|------|------|----------|-------|-------------|------------|-------------|
| NLC -11 | 0.15 | 0.10 | 1.00 | 12000.00 | 15.00 | 195.33±6.38 | 52.64±1.35 | 0.196±0.012 |
| NLC -12 | 0.15 | 0.20 | 1.00 | 12000.00 | 15.00 | 245.51±4.63 | 69.26±2.42 | 0.250±0.023 |
| NLC -13 | 0.15 | 0.15 | 1.00 | 12000.00 | 10.00 | 278.39±2.36 | 76.16±2.31 | 0.295±0.018 |
| NLC -14 | 0.20 | 0.15 | 1.00 | 8000.00  | 10.00 | 274.52±2.02 | 91.94±2.12 | 0.257±0.017 |
| NLC -15 | 0.15 | 0.15 | 0.50 | 8000.00  | 10.00 | 316.24±5.62 | 88.16±2.62 | 0.396±0.026 |
| NLC -16 | 0.15 | 0.10 | 1.00 | 16000.00 | 10.00 | 215.21±4.66 | 60.35±1.14 | 0.248±0.021 |
| NLC -17 | 0.20 | 0.20 | 1.00 | 12000.00 | 10.00 | 305.14±7.63 | 92.56±1.65 | 0.255±0.024 |
| NLC -18 | 0.15 | 0.15 | 1.50 | 12000.00 | 5.00  | 230.15±6.42 | 76.78±2.57 | 0.303±0.014 |
| NLC -19 | 0.15 | 0.15 | 1.50 | 8000.00  | 10.00 | 223.62±5.72 | 69.71±2.67 | 0.277±0.026 |
| NLC -20 | 0.15 | 0.15 | 1.50 | 16000.00 | 10.00 | 165.62±6.36 | 59.74±3.60 | 0.237±0.012 |
| NLC -21 | 0.10 | 0.10 | 1.00 | 12000.00 | 10.00 | 262.32±4.68 | 52.42±2.46 | 0.310±0.028 |
| NLC -22 | 0.10 | 0.15 | 1.00 | 12000.00 | 15.00 | 211.35±7.56 | 74.97±3.25 | 0.271±0.022 |
| NLC -23 | 0.15 | 0.15 | 1.00 | 12000.00 | 10.00 | 277.34±8.34 | 74.26±2.61 | 0.295±0.013 |
| NLC -24 | 0.15 | 0.10 | 1.00 | 8000.00  | 10.00 | 275.62±7.35 | 70.62±2.52 | 0.290±0.024 |
| NLC -25 | 0.20 | 0.15 | 0.50 | 12000.00 | 10.00 | 291.25±7.25 | 92.27±1.75 | 0.306±0.031 |
| NLC -26 | 0.15 | 0.20 | 1.50 | 12000.00 | 10.00 | 245.36±4.40 | 76.24±2.74 | 0.275±0.023 |
| NLC -27 | 0.20 | 0.15 | 1.50 | 12000.00 | 10.00 | 198.53±3.83 | 86.18±2.96 | 0.184±0.013 |
| NLC -28 | 0.15 | 0.20 | 1.00 | 12000.00 | 5.00  | 331.32±2.52 | 91.36±1.71 | 0.374±0.032 |
| NLC -29 | 0.15 | 0.10 | 0.50 | 12000.00 | 10.00 | 284.21±3.61 | 75.82±4.38 | 0.343±0.012 |
| NLC -30 | 0.15 | 0.20 | 1.00 | 16000.00 | 10.00 | 265.76±7.34 | 77.93±2.23 | 0.305±0.022 |
| NLC -31 | 0.15 | 0.15 | 1.00 | 12000.00 | 10.00 | 273.46±6.32 | 72.61±3.21 | 0.297±0.021 |
| NLC -32 | 0.20 | 0.10 | 1.00 | 12000.00 | 10.00 | 251.25±9.46 | 87.13±3.67 | 0.203±0.024 |
| NLC -33 | 0.15 | 0.15 | 1.00 | 8000.00  | 15.00 | 224.97±6.30 | 62.28±2.36 | 0.252±0.025 |
| NLC -34 | 0.15 | 0.20 | 1.00 | 8000.00  | 10.00 | 325.63±4.75 | 87.86±3.83 | 0.345±0.032 |
| NLC -35 | 0.20 | 0.15 | 1.00 | 12000.00 | 5.00  | 288.26±4.72 | 94.36±1.32 | 0.282±0.032 |
| NLC -36 | 0.15 | 0.10 | 1.00 | 12000.00 | 5.00  | 280.45±9.43 | 77.15±4.86 | 0.317±0.031 |
| NLC -37 | 0.10 | 0.15 | 1.50 | 12000.00 | 10.00 | 210.15±5.27 | 51.72±3.98 | 0.294±0.026 |
| NLC -38 | 0.10 | 0.15 | 1.00 | 8000.00  | 10.00 | 290.52±8.21 | 62.78±4.92 | 0.368±0.014 |
| NLC -39 | 0.15 | 0.15 | 0.50 | 12000.00 | 15.00 | 236.26±3.67 | 67.37±2.71 | 0.301±0.030 |
| NLC -40 | 0.20 | 0.15 | 1.00 | 16000.00 | 10.00 | 226.86±4.44 | 86.62±3.72 | 0.213±0.021 |
| NLC -41 | 0.15 | 0.15 | 1.50 | 12000.00 | 15.00 | 147.78±2.35 | 51.28±4.22 | 0.182±0.012 |
| NLC -42 | 0.10 | 0.15 | 1.00 | 16000.00 | 10.00 | 230.24±3.56 | 51.23±3.14 | 0.324±0.019 |
| NLC -43 | 0.15 | 0.15 | 1.00 | 16000.00 | 15.00 | 165.26±2.46 | 52.67±2.84 | 0.211±0.015 |
| NLC -44 | 0.20 | 0.15 | 1.00 | 12000.00 | 15.00 | 201.62±4.72 | 79.16±2.92 | 0.163±0.012 |
| NLC -45 | 0.15 | 0.15 | 0.50 | 12000.00 | 5.00  | 322.62±3.47 | 89.45±3.17 | 0.423±0.038 |
| NLC -46 | 0.15 | 0.15 | 0.50 | 16000.00 | 10.00 | 253.25±3.78 | 75.26±2.29 | 0.353±0.033 |

HS: Homogenization speed, ST: Sonication time, PS: Particle size, EE: Entrapment efficiency, PDI: Polydispersity index, mean±SD, n=3.

## Reference:

1. ICH Q8(R2) Pharmaceutical Development (2005) [http://www.ich.org/fileadmin/Public\\_Web\\_Site/ICH\\_Products/Guidelines/Quality/Q8\\_R1/Step4/Q8\\_R2\\_Guideline.pdf](http://www.ich.org/fileadmin/Public_Web_Site/ICH_Products/Guidelines/Quality/Q8_R1/Step4/Q8_R2_Guideline.pdf) ). [Accessed on May 21, 2015].
2. S. Martins, I. Tho, I. Reimold, G. Fricker, E. Souto, D. Ferreira and M. Brandl, *International Journal of Pharmaceutics*, 2012, 439, 49-62.
3. L. Kozlovskaya, M. Abou-Kaoud and D. Stepensky, *Journal of controlled release*, 2014, 189, 133-140.
4. J. N. Betts, M. G. Johnson, P. T. Rygielwicz, G. A. King and C. P. Andersen, *Environmental toxicology and chemistry / SETAC*, 2013, 32, 889-893.
